# Supplementary material for: Electric field causes volumetric changes in the human brain
Source: eLife. 2019 Oct 23;8:e49115. doi: 10.7554/eLife.49115 (PMC6874416; doi:10.7554/eLife.49115)
Supplement: Figure 1—source data 1. [file elife-49115-fig1-data1.csv]

	roi	mean_ef	dvol_effsize	side
1	Left.Cerebellum.Cortex	56.53735099	0.042686769	2
2	Left.Thalamus.Proper	83.1392053	0.861226058	2
3	Left.Caudate	62.7910596	0.55287019	2
4	Left.Putamen	71.74403974	0.402044807	2
5	Left.Pallidum	89.53635762	0.709020993	2
6	Brain.Stem	79.6113245	0.159568352	1
7	Left.Hippocampus	68.47933775	0.749669845	2
8	Left.Amygdala	58.68218543	1.033568089	2
9	Left.Accumbens.area	108.9366887	0.486385978	2
10	Left.VentralDC	103.7115232	0.433592768	2
11	Right.Cerebellum.Cortex	63.66430464	0.045793535	1
12	Right.Thalamus.Proper	105.7192053	1.228795818	1
13	Right.Caudate	110.401457	0.768998111	1
14	Right.Putamen	135.772053	0.986454861	1
15	Right.Pallidum	145.8184106	1.099139324	1
16	Right.Hippocampus	105.1874172	1.349835236	1
17	Right.Amygdala	100.45	1.767805762	1
18	Right.Accumbens.area	154.0386755	0.984047854	1
19	Right.VentralDC	126.474106	0.631425293	1
20	ctx.lh.bankssts	57.8805298	0.619207446	2
21	ctx.lh.caudalanteriorcingulate	106.039404	0.916171096	2
22	ctx.lh.caudalmiddlefrontal	79.97490066	0.673251476	2
23	ctx.lh.cuneus	79.00847682	0.483872053	2
24	ctx.lh.entorhinal	52.25192053	0.613918296	2
25	ctx.lh.fusiform	55.81622517	0.78034016	2
26	ctx.lh.inferiorparietal	63.66423841	0.70424764	2
27	ctx.lh.inferiortemporal	50.92450331	0.667383084	2
28	ctx.lh.isthmuscingulate	101.1049007	0.263715802	2
29	ctx.lh.lateraloccipital	58.69993377	0.607873565	2
30	ctx.lh.lateralorbitofrontal	56.64403974	0.294460949	2
31	ctx.lh.lingual	60.93	0.52239704	2
32	ctx.lh.medialorbitofrontal	67.77615894	0.270730811	2
33	ctx.lh.middletemporal	53.63993377	0.438655702	2
34	ctx.lh.parahippocampal	66.9918543	0.73669728	2
35	ctx.lh.paracentral	90.7489404	0.808389864	2
36	ctx.lh.parsopercularis	65.71900662	0.811065811	2
37	ctx.lh.parsorbitalis	53.69046358	0.217693307	2
38	ctx.lh.parstriangularis	54.06708609	0.529183011	2
39	ctx.lh.pericalcarine	65.68258278	0.470652035	2
40	ctx.lh.postcentral	68.63291391	0.546953242	2
41	ctx.lh.posteriorcingulate	136.2770861	0.549599546	2
42	ctx.lh.precentral	74.43350993	0.774667408	2
43	ctx.lh.precuneus	85.61821192	0.573005261	2
44	ctx.lh.rostralanteriorcingulate	79.6592053	0.480398426	2
45	ctx.lh.rostralmiddlefrontal	60.71523179	0.409258252	2
46	ctx.lh.superiorfrontal	86.10350993	0.698617976	2
47	ctx.lh.superiorparietal	66.14211921	0.691023435	2
48	ctx.lh.superiortemporal	54.04112583	0.472332722	2
49	ctx.lh.supramarginal	66.54344371	0.766473813	2
50	ctx.lh.frontalpole	54.20072848	0.194210407	2
51	ctx.lh.temporalpole	46.76821192	0.67130835	2
52	ctx.lh.transversetemporal	55.17192053	0.353950548	2
53	ctx.rh.bankssts	122.2349669	0.945587147	1
54	ctx.rh.caudalanteriorcingulate	111.1052318	1.149342291	1
55	ctx.rh.caudalmiddlefrontal	169.7218543	0.761906304	1
56	ctx.rh.cuneus	85.7202649	0.674967524	1
57	ctx.rh.entorhinal	120.930596	1.081008045	1
58	ctx.rh.fusiform	94.44099338	1.191028517	1
59	ctx.rh.inferiorparietal	115.0958278	0.795392198	1
60	ctx.rh.inferiortemporal	112.3088742	1.156846584	1
61	ctx.rh.isthmuscingulate	107.4949007	0.340294241	1
62	ctx.rh.lateraloccipital	77.76317881	0.671468965	1
63	ctx.rh.lateralorbitofrontal	152.8899338	0.52480718	1
64	ctx.rh.lingual	69.55450331	0.74772062	1
65	ctx.rh.medialorbitofrontal	111.266755	0.611731172	1
66	ctx.rh.middletemporal	149.6912583	0.944047762	1
67	ctx.rh.parahippocampal	100.4681333	1.019661386	1
68	ctx.rh.paracentral	120.5580795	0.947447357	1
69	ctx.rh.parsopercularis	173.0323179	0.75545004	1
70	ctx.rh.parsorbitalis	189.697947	0.393228333	1
71	ctx.rh.parstriangularis	178.5121192	0.794675425	1
72	ctx.rh.pericalcarine	73.82529801	0.6450097	1
73	ctx.rh.postcentral	164.843245	0.648290712	1
74	ctx.rh.posteriorcingulate	140.7507947	0.686849595	1
75	ctx.rh.precentral	176.2582781	0.779011763	1
76	ctx.rh.precuneus	97.48006623	0.733852263	1
77	ctx.rh.rostralanteriorcingulate	95.44178808	1.026774197	1
78	ctx.rh.rostralmiddlefrontal	135.4418543	0.581748779	1
79	ctx.rh.superiorfrontal	112.8221192	0.760342733	1
80	ctx.rh.superiorparietal	100.6064901	0.584020718	1
81	ctx.rh.superiortemporal	158.2793377	1.272374778	1
82	ctx.rh.supramarginal	158.5197351	1.012234296	1
83	ctx.rh.frontalpole	96.44821192	0.289144413	1
84	ctx.rh.temporalpole	151.5007947	1.225871411	1
85	ctx.rh.transversetemporal	130.0401325	0.800398424	1
