# Supplementary material for: Electric field causes volumetric changes in the human brain
Source: eLife. 2019 Oct 23;8:e49115. doi: 10.7554/eLife.49115 (PMC6874416; doi:10.7554/eLife.49115)
Supplement: Figure 2—source data 1. [file elife-49115-fig2-data1.csv]

	roi	dvol_RvL_effsize	ef_RvL_effsize
1	Cerebellum.Cortex	0.00116565472446787	3.83143046434294
2	Thalamus.Proper	0.439155488806032	3.51592142774738
3	Caudate	0.108598311640491	3.12757527920559
4	Putamen	0.239865128436273	3.04298667153321
5	Pallidum	0.336485872878637	3.2613018592573
6	Hippocampus	0.622674136802568	3.24265809314353
7	Amygdala	1.10552736586394	2.60507414700718
8	Accumbens.area	0.402286194501062	2.90963512133009
9	VentralDC	0.164733723081363	3.44000428677912
10	ctx.bankssts	0.245196943284314	4.26199807649282
11	ctx.caudalanteriorcingulate	0.0517568537004146	0.706741073196519
12	ctx.caudalmiddlefrontal	0.0790254395382853	1.87078121549797
13	ctx.cuneus	0.199745495812853	1.67299814616536
14	ctx.entorhinal	0.477866972522264	4.30070138543676
15	ctx.fusiform	0.536756272530983	3.99449418913233
16	ctx.inferiorparietal	0.0594051172968431	3.4694505240378
17	ctx.inferiortemporal	0.331767494641792	3.45127716605155
18	ctx.isthmuscingulate	0.0250075343349364	1.39233213708194
19	ctx.lateraloccipital	0.148944191327502	3.67789364490258
20	ctx.lateralorbitofrontal	0.359117212199413	4.36709228864696
21	ctx.lingual	0.278814946441243	2.21960244295542
22	ctx.medialorbitofrontal	0.463174995380407	5.34219562124158
23	ctx.middletemporal	0.278721330630416	3.09926761824082
24	ctx.parahippocampal	0.42850630088004	4.11708338596724
25	ctx.paracentral	0.107405872064337	1.28670070271943
26	ctx.parsopercularis	-0.0066525727734681	3.81212234618476
27	ctx.parsorbitalis	0.184768773410684	2.60287211868391
28	ctx.parstriangularis	0.187673170765229	3.33808997823682
29	ctx.pericalcarine	0.177803179631894	1.62161105670435
30	ctx.postcentral	0.135701531780068	1.61592464253894
31	ctx.posteriorcingulate	0.146016303209227	0.86134860199453
32	ctx.precentral	0.0632401557077172	1.74434684553943
33	ctx.precuneus	0.145305655156958	2.39094287012912
34	ctx.rostralanteriorcingulate	0.438169842041277	3.83322971747374
35	ctx.rostralmiddlefrontal	0.220085500786912	5.62081403379532
36	ctx.superiorfrontal	0.073922539522739	2.27507873589101
37	ctx.superiorparietal	-0.0438581983158433	1.59732980800094
38	ctx.superiortemporal	0.702509051908769	2.79712022494182
39	ctx.supramarginal	0.172402688119734	3.40200694545432
40	ctx.frontalpole	0.0632160265056578	3.05860562728357
41	ctx.temporalpole	0.539504480377002	2.77572660195228
42	ctx.transversetemporal	0.478760607217695	4.03467421106053
