# Supplementary material for: Electric field causes volumetric changes in the human brain
Source: eLife. 2019 Oct 23;8:e49115. doi: 10.7554/eLife.49115 (PMC6874416; doi:10.7554/eLife.49115)
Supplement: Figure 3—figure supplement 1—source data 1. [file elife-49115-fig3-figsupp1-data1.csv]

t_withoutpermutation	permnum	t_withpermutation	permtype
4.26906343401305	1	0.554684156816774	1
4.26906343401305	2	0.980305320600277	1
4.26906343401305	3	1.04133838636136	1
4.26906343401305	4	0.954927481528104	1
4.26906343401305	5	0.642578783046721	1
4.26906343401305	6	1.44334137980689	1
4.26906343401305	7	4.26906343401305	1
4.26906343401305	8	3.40246823947298	1
4.26906343401305	9	1.94108793597603	1
4.26906343401305	10	0.211728680896204	1
4.26906343401305	11	0.112868941571969	1
4.26906343401305	12	0.99661339407815	1
4.26906343401305	13	1.02936710066688	1
4.26906343401305	14	1.48258067366507	1
4.26906343401305	15	0.971905821978445	1
4.26906343401305	16	1.98305920065983	1
4.26906343401305	17	5.15415788888361	1
4.26906343401305	18	2.63307037251631	1
4.26906343401305	19	0.225333897337368	1
4.26906343401305	20	0.463429201192521	1
4.26906343401305	21	2.26829563020695	1
4.26906343401305	22	-1.07757770829347	1
4.26906343401305	23	-0.522942187906196	1
4.26906343401305	24	3.47305988383183	1
4.26906343401305	25	3.47970683826335	1
4.26906343401305	26	0.560261732182203	1
4.26906343401305	27	2.24901258576624	1
4.26906343401305	28	0.166804771683935	1
4.26906343401305	29	0.307815782970295	1
4.26906343401305	30	2.11687966815087	1
4.26906343401305	31	0.576381363919559	1
4.26906343401305	32	2.05516691002829	1
4.26906343401305	33	1.62332085957945	1
4.26906343401305	34	2.33105715181541	1
4.26906343401305	35	-1.41602158662583	1
4.26906343401305	36	-0.837353303216519	1
4.26906343401305	37	1.48601990830629	1
4.26906343401305	38	0.0863228239755481	1
4.26906343401305	39	0.358239568617198	1
4.26906343401305	40	-0.223499571224606	1
4.26906343401305	41	0.308671777842729	1
4.26906343401305	42	-0.128981699092962	1
4.26906343401305	43	-0.609442099600358	1
4.26906343401305	44	1.59399929617961	1
4.26906343401305	45	-0.790283788256393	1
4.26906343401305	46	-0.441162425445474	1
4.26906343401305	47	-0.741322920229813	1
4.26906343401305	48	1.19539167132739	1
4.26906343401305	49	0.407179616453351	1
4.26906343401305	50	1.44620858189891	1
4.26906343401305	51	3.81663850001877	1
4.26906343401305	52	-0.0670145950216276	1
4.26906343401305	53	0.196683572783246	1
4.26906343401305	54	0.197374759693656	1
4.26906343401305	55	-2.93987468574645	1
4.26906343401305	56	-0.322459307762554	1
4.26906343401305	57	5.21665052733375	1
4.26906343401305	58	3.26422166124033	1
4.26906343401305	59	-0.274502105417492	1
4.26906343401305	60	2.36823248209615	1
4.26906343401305	61	0.61117527302948	1
4.26906343401305	62	0.0951181448095896	1
4.26906343401305	63	1.65508092219051	1
4.26906343401305	64	0.578287115779074	1
4.26906343401305	65	1.89483085800711	1
4.26906343401305	66	1.29823938546717	1
4.26906343401305	67	3.52218286210544	1
4.26906343401305	68	-0.840006462068295	1
4.26906343401305	69	-1.2392539660581	1
4.26906343401305	70	1.65727525912212	1
4.26906343401305	71	-1.15585057185305	1
4.26906343401305	72	0.0897926558400913	1
4.26906343401305	73	-2.43363367870343	1
4.26906343401305	74	0.127792979016732	1
4.26906343401305	75	-2.21450960294457	1
4.26906343401305	76	-1.01442548523299	1
4.26906343401305	77	2.30471048728244	1
4.26906343401305	78	-1.66605785270952	1
4.26906343401305	79	-1.55194311080842	1
4.26906343401305	80	-1.65445815166248	1
4.26906343401305	81	0.90271908698464	1
4.26906343401305	82	-1.11019386877373	1
4.26906343401305	83	1.44518783281185	1
4.26906343401305	84	3.79443602735074	1
4.26906343401305	85	0.269968511355582	1
4.26906343401305	1	3.23856724521966	2
4.26906343401305	2	3.07089821739726	2
4.26906343401305	3	3.53248786165821	2
4.26906343401305	4	3.75792426681181	2
4.26906343401305	5	3.57035278501725	2
4.26906343401305	6	3.38981528790963	2
4.26906343401305	7	4.26906343401305	2
4.26906343401305	8	4.03704912239728	2
4.26906343401305	9	3.16455673112408	2
4.26906343401305	10	3.38858282039794	2
4.26906343401305	11	3.46563453555567	2
4.26906343401305	12	2.43413866102044	2
4.26906343401305	13	1.33970888527044	2
4.26906343401305	14	1.58674117368275	2
4.26906343401305	15	1.74716396895909	2
4.26906343401305	16	2.29015741498526	2
4.26906343401305	17	1.68018081146407	2
4.26906343401305	18	1.66530958824925	2
4.26906343401305	19	2.56996551499314	2
4.26906343401305	20	3.85561285481494	2
4.26906343401305	21	3.31325374723467	2
4.26906343401305	22	2.39854385109241	2
4.26906343401305	23	2.65635129658561	2
4.26906343401305	24	3.23175138346616	2
4.26906343401305	25	4.07686869572859	2
4.26906343401305	26	2.7963946614581	2
4.26906343401305	27	3.86265553330791	2
4.26906343401305	28	2.34817895736714	2
4.26906343401305	29	3.40925133983869	2
4.26906343401305	30	3.55739393786753	2
4.26906343401305	31	4.38099402978012	2
4.26906343401305	32	3.69839243495786	2
4.26906343401305	33	3.45668312392499	2
4.26906343401305	34	4.10856142617891	2
4.26906343401305	35	0.901643872396728	2
4.26906343401305	36	3.7135127033007	2
4.26906343401305	37	2.61555488910689	2
4.26906343401305	38	3.95504907829136	2
4.26906343401305	39	3.15515751929511	2
4.26906343401305	40	3.44580695663661	2
4.26906343401305	41	1.54408512398215	2
4.26906343401305	42	2.87039087237467	2
4.26906343401305	43	1.75849442049299	2
4.26906343401305	44	3.36053480745188	2
4.26906343401305	45	3.15831531229552	2
4.26906343401305	46	1.73012116781453	2
4.26906343401305	47	2.03780217948891	2
4.26906343401305	48	3.87463753400279	2
4.26906343401305	49	2.77477877095569	2
4.26906343401305	50	1.99128720866295	2
4.26906343401305	51	1.81397123472442	2
4.26906343401305	52	3.23409231783455	2
4.26906343401305	53	1.37035006458221	2
4.26906343401305	54	2.77342294006917	2
4.26906343401305	55	-0.140917696961748	2
4.26906343401305	56	1.99419609094389	2
4.26906343401305	57	1.56958686806355	2
4.26906343401305	58	1.97820605846551	2
4.26906343401305	59	1.30034417756343	2
4.26906343401305	60	1.07117738369331	2
4.26906343401305	61	2.62729717447129	2
4.26906343401305	62	3.04293730326549	2
4.26906343401305	63	1.30182590231027	2
4.26906343401305	64	3.30492094514842	2
4.26906343401305	65	2.92993762632647	2
4.26906343401305	66	0.0132460998185698	2
4.26906343401305	67	2.46316796016425	2
4.26906343401305	68	0.622738232340437	2
4.26906343401305	69	2.03224138503611	2
4.26906343401305	70	0.341750140075967	2
4.26906343401305	71	1.09864373678097	2
4.26906343401305	72	2.5186226072405	2
4.26906343401305	73	1.49222807539175	2
4.26906343401305	74	1.8306592623984	2
4.26906343401305	75	0.209351729168983	2
4.26906343401305	76	1.68349610431811	2
4.26906343401305	77	3.24025164186489	2
4.26906343401305	78	2.03882052592528	2
4.26906343401305	79	1.20250405337458	2
4.26906343401305	80	1.43862540610969	2
4.26906343401305	81	0.910764240272353	2
4.26906343401305	82	1.46039366967332	2
4.26906343401305	83	2.19556238654714	2
4.26906343401305	84	0.16025627552445	2
4.26906343401305	85	1.45448344787296	2
