# Supplementary material for: Electric field causes volumetric changes in the human brain
Source: eLife. 2019 Oct 23;8:e49115. doi: 10.7554/eLife.49115 (PMC6874416; doi:10.7554/eLife.49115)
Supplement: Figure 3—source data 1. [file elife-49115-fig3-data1.csv]

subjid	side	volumechange_Hippocampus	EF_Hippocampus
8795f0db2265fb56ab3c0d4ee9bda16c	1	1.65604	56.8
0eda715eca398113135370b1e65b8c34	1	1.269881	54.4
1502353e43babd426a862ba15dce65da	1	0.2170655	66.8
961e31139ae768b9d14fbb2f6e50fc3f	1	0.8606425	63.84
565c9351007d7479283b6e6b548caa4b	1	2.0145545	71.76
35eab82659fd800fd61a0877d595f674	1	-2.2357435	63.68
3774f0102f5e0c4f7f933537add1dc49	1	2.820857	66.72
55c7a10e4a50cbc28b48138bbe9c23e0	1	0.1935365	64.24
d4f44960257ccca79c48dcad305d9890	1	0.807981	50.4
8f2aea618a4edd1f6deeb3b72ce46d0f	1	-1.3026705	74
7faac8b75f5d660a026bad4112764bc4	1	2.1810395	63.2
f1a026999130c9e825bd882c0a654d3c	1	3.53467	67.12
30e1e3a9b8f333f7948260d700416b5f	1	1.639762	55.92
cddf742dbf60b919c4eff735ff87005b	1	2.517057	70.72
3f173f73e8e1d06fe4ed7eeedee7a2cd	1	1.5498795	65.04
705ecb6e24ec3d70cd1b050ad45aae46	1	2.0303795	73.76
015a5f0dec6757e1ac48c5e4ab59f993	1	0.286549	60.64
af2e2787bc098c147a7b9b9d67dde1e6	1	3.5728595	66.88
53dbe04e4c976aeaa0ce9237877203a4	1	2.45775	61.84
669cd59c5d68a0402b0af0a3d49fb7f5	1	2.6468015	58.56
46aacc81600352f960c752a08fd9f74a	1	3.5984935	66.56
37ae550b31b1a1f04838fe9ab3d5936e	1	0.5886375	58
2afd866d4129ef3634dfcdcc6ad185b5	1	1.7416225	57.84
ade31edec13cd362d4386c185569fa5f	1	-0.279282	66.48
0ee1c6fa0c48fbec98094294faf19e53	1	3.3923005	68.8
502deaba35e3801c7a8b1c4dff5008a4	1	2.8005945	69.04
7435ede765b1fcb88aeb0f8438f8f59b	1	1.7608475	60.72
9c8919fd220801edc5792b96c1e785a3	1	5.468832	67.68
f460a179f26bbabeb23c7846dccd1cff	1	0.468772	62.08
e418437aeb8353a10f5115c71f3e589c	1	-1.105482	60.93
1c25f1c0f0b073357e53f11a06591316	1	-0.3058965	67.32
964c77a342b7ecb6b5d53e94b441a3dd	1	0.5697385	78.84
7f867af2c80a5c7c46e1543b74dcd6e9	1	2.2162055	77.85
c4e24cb1745c1df6da0ddcc0980a6948	1	-1.2241985	72.99
4f2c76ba6680320d255730c6b532c741	1	1.320263	61.74
b9eac2ab1831163a2dd8a2a678c57d09	1	1.6583075	76.41
b0da6be751a32c10e588cbd80e0e0e4f	1	-0.8439935	62.01
5504306b5ab7a7b339fdd1fb888ad660	1	-0.653368	66.33
6b68df6ac31ba9008b9cf26d6df2b322	1	1.8880265	65.88
c11e70fd3bb3a4c6ee33cc3351431031	1	-0.376257	67.86
42882276ae51f6f3387e8ae615314e79	1	-1.4564645	65.25
b1a215685913442edac162b52ad84c0f	1	-0.7905215	50.94
8fed58ab8620e6a252a2c85ace7caa23	1	2.9928975	75.87
8245f00250a5ac2074403b1209a294b6	1	-2.0346065	60.3
3414ee835420d25b91897a16c9037013	1	0.597566	74.43
7b2e94981915dccbadcaecb7cb6dfe50	1	0.903538	74.34
ac5eddb7049231e321305035294c7f12	1	0.3619605	66.06
5852b9b7b0099cb192eaf569f251bfb3	1	0.3632415	78.66
00f52b18c97c1dd20a10ef703d2acb92	1	-0.401173	72.81
598f0141ed45aeda375d4cb02d44bd2f	1	4.454797	73.62
ff08c92ab956f4371d11f655b02a8b04	1	1.0287745	64.53
62c5644c806b77dced46cfca9e8e375e	1	-0.5498445	64.89
81d708849964e66fcc0b1965de6746b4	1	2.394105	75.15
95dd62fb0f5b9b8d65ce3aabb3b00260	1	1.8470075	69.39
7c8d8424f0a7e7da5139f73f35ba15af	1	-1.3560345	65.79
af0a2290f85d62beaf800264713f85cd	1	-3.772261	52.38
3d87bd37cd2d39c82907d4947d249924	1	-1.1724285	70.56
a78750f2fae7643ca26df22fa5fb8069	1	1.1979975	66.42
fd9eb5e0ec923ebf1cfec6972c100af7	1	0.7376645	63.54
b23432019770025299967d6260823967	1	1.385022	73.89
848f28cb8c90a754a4f1a26046948936	1	1.908663	50.04
7dd47f8bd2152b1fe869b8da3b7ef4e0	1	0.5229905	70.02
21dac7965e4dae969a4458ed4a1aee62	1	8.2163085	71.37
376e731bd0a51e9eca5a8a05eb56f348	1	5.1071715	82.53
98b077ce5f3cd803db12e2d37d040e4e	1	-0.46499	66.87
6455752e7da98a364550904e67fe7876	1	2.767857	71.37
0c79fb953b1b044378b2807b37446deb	1	2.4464135	64.44
fde7aab7748c0d040410d958efc5554f	1	2.794141	68.58
63b73a5f6ceafb1e5ba5300eb64c1aac	1	0.4371825	59.31
d21dec9af97a634c83676bb7a099356a	1	1.239088	71.73
4bb66c15444c5e12efe0c93f27ab71da	1	-0.3063155	56.79
6b931fb6e4e3bb0c9cf459592f0f2f8f	1	3.861835	77.13
ca87c4252b83eeca7d8e18b1a8bd3764	1	-0.1787195	62.1
01e6c32ac455d1b66d50905981846b5a	1	0.313013	57.96
0e54279e9934046cdfe989c2f318f913	1	1.313671	70.2
877a59352135e57238da9de95dbdb360	1	1.3095185	55.62
1f32a97ea4aa9e20da74dcc2faec6506	1	3.100222	77.85
bb0beb6e0c7e85454c932da94f81a877	1	4.0735385	75.24
c5dbeef337d72515941b8889442391e9	1	-0.1555455	71.1
570dcc61634f0abd7ab64fdc5a814e96	1	3.5609355	85.68
9b362dcd8076f9c8e72f7d59056fc9fc	1	2.6890545	80.55
556cc8e8b830e7cac1582d5ea81ed555	1	0.9076285	52.74
48e1ff3a09a7350b58f8f68c48820495	1	4.9726345	82.98
c5fc58a9fa47b4be81bcf6bbea8d7601	1	3.110683	83.79
9bfdb32ac5dcc150404e70072b2ac506	1	2.126995	61.29
7f7c648e9fe8a75a84abc271b99abe14	1	5.742038	75.42
091987379e2bf9405e59b2314357f95b	1	2.2098375	72.18
b12037c6ab77ad09edc61ff6722eb121	1	1.6677435	74.79
681d695fd33a6d465647704b4dbbd175	1	3.7692335	85.95
1bd9ec54997f2592917e267fecfb7352	1	4.0536265	71.73
f86a2b4a0622947e27d7bbd8389c5820	1	2.3091705	62.19
ed7fcf0526aca16dbd949eaeb149f611	1	2.0210915	64.62
faf518aa57809b50abb3006f51c768bd	1	4.49509	73.62
4177f1fd02df9b42c8451ef3299d93e2	1	0.572788	70.47
f6b6d54dbd8bb356cf4bbd7d6bfe756c	1	0.8993545	78.84
58cce52046c463ded7ed974096bb66b3	1	1.100888	70.11
49d272ae57189a4c2fe37c640913f748	1	2.8707955	84.51
820d1d82d06025d704530e66798a34a6	1	1.6209775	76.77
45ecedbeb599575fe6cf84f8d611018e	1	2.9023715	66.15
9fa0add48ba90aa621c53f3e5bb02bf9	1	1.05291	62.64
6fa0f5885b3cdb2b06ea41bc0920b953	1	0.043741	64.53
7d25c8ef5db7aad70cd1997c5d194a51	1	3.412247	76.77
a7ad9bec1ecebf0143fb94fb7d31058a	1	2.173789	76.86
f922d99962e3accb2b7f4935c1314228	1	0.8332395	73.71
ee9531cf64f3b093416a8f1fc5967332	1	3.780093	76.68
73fb6a16d5c29715da5fc26f2058db00	1	0.5459165	71.68
62ba75c5a8f665dac1a842ba4247e0c6	1	4.0901035	67.68
1c251babed8b129da686abf782edf402	1	8.1096595	72.9
dc36db9b590751283f2a85c750a3afd3	1	3.069864	59.13
cfd13f6204e59ca973b7853571be151a	1	0.8871535	66.6
311d6efee5b808962e1297b4af1059ae	1	-1.0548315	60.48
741dd76786b5e480f4cd133a6ae25cef	1	-1.8019375	78.84
a1d9110eb8c214c2d12ac867965be614	1	8.439384	70.83
72ba81542ef2eae4492d063dc9ed714f	1	3.5860255	74.25
42d49795c3656af70a38fe86281b2664	1	7.262564	73.53
95c05f9a92966cff5d31ea1929108678	1	-0.437479	56.52
5a9cc554abd62545680148b0caea54ea	1	1.57402827210884	68.58
6e20421194c223d7ff1e802c5b7bcd91	1	1.7581955	64.89
39ae0dd9a3276a7e89da831793125821	1	1.7012215	81.81
c7fdd91c114fc839fc2699a3e19b2f6f	1	-0.872989	71.64
d38af6c6b48fc713c9c157a3a53a8bb3	1	5.0077605	67.95
3c260f5683b2c67839a80973670f1035	1	1.57402827210884	66.51
2e39f14fd3e7feb95b126ec82a4b09a0	1	0.746411	65.88
cf200074de046f7d6bbec19764c7961c	1	-0.695406	70.74
9bb1cac8bb334b282ea28aaabaea1e70	1	0.5796835	66.06
508b6d96f44d4e8657e0950266a94ebd	1	-0.440279	74.7
b71959b432fb54089c8ce1fb7da72008	1	-0.921411	64.8
da253cace84774e894482fd3d51f386b	1	5.069202	84.15
b1abcd74fb6fffd436340dd3a9269e49	1	1.6020365	64.26
15c9b433db25a7f561fa0f94d28d723d	1	6.273968	69.12
119b33260cd28b9267f3fe3c28e4a740	1	1.57402827210884	74.79
3489c4c31e497079be54984ad4e6f1c0	1	1.975196	65.7
5b020fa36137af642f81a16bc9441084	1	-0.394079	63.63
c01efb8e6afbd762698154020f7be8cf	1	1.57402827210884	71.01
9aa15e52b38085acfb6a8b6f2f11d012	1	2.7644065	61.92
73992bba2ca9c1ed170144b9a3605104	1	0.6269495	66.51
a6f48a1399859538f2954374b6ce0e22	1	2.488011	61.29
de1007564335c545a9b18973a7e6c129	1	-3.204339	66.69
39d3518d61f770c0d3f80eb090cc7e71	1	0.7868475	68.04
409b5bd81af1bac6ade6b9e15e8f40f8	1	0.382523	68.04
342d3df772e2d9e27350123b0a81c0bf	1	2.0138765	71.64
415481088b64c0cddf4173dc4f1d3b72	1	0.6559165	71.28
b31ec8386d9a531d2507593ac24cfaf5	1	0.747891	80.73
a725bcb110ed89344a3bfeb1ad077de4	1	0.919821	81.18
ecac018d8617efe6117a5efca744237a	1	0.772383	69.66
885a8614deb025680fbe97e4279c0e4b	1	1.817673	83.43
b32eda8aab00c85dfaf988b60b23b1c3	1	-0.4116415	61.02
8444c73644efb6f0103ecebd7929bade	1	-0.162885	57.51
a430b7181e80bab482d32a07bc1a33c4	1	0.73808	66.51
4004900ec1d7f6998bef07aee4f1905e	1	2.455668	75.78
248b605ead25de828c3f8677a01fa04b	1	2.56575	64.17
8795f0db2265fb56ab3c0d4ee9bda16c	2	0.954282	75.2
0eda715eca398113135370b1e65b8c34	2	3.455839	76.4
1502353e43babd426a862ba15dce65da	2	1.0413055	90.4
961e31139ae768b9d14fbb2f6e50fc3f	2	1.5168885	90.32
565c9351007d7479283b6e6b548caa4b	2	2.4716475	104.32
35eab82659fd800fd61a0877d595f674	2	-0.064691	102.4
3774f0102f5e0c4f7f933537add1dc49	2	4.2439435	98.24
55c7a10e4a50cbc28b48138bbe9c23e0	2	0.974859	93.6
d4f44960257ccca79c48dcad305d9890	2	1.4318215	71.68
8f2aea618a4edd1f6deeb3b72ce46d0f	2	1.015606	108.24
7faac8b75f5d660a026bad4112764bc4	2	1.726256	90.64
f1a026999130c9e825bd882c0a654d3c	2	3.078862	98.56
30e1e3a9b8f333f7948260d700416b5f	2	1.5097035	87.68
cddf742dbf60b919c4eff735ff87005b	2	4.5616495	106.24
3f173f73e8e1d06fe4ed7eeedee7a2cd	2	2.577573	86.24
705ecb6e24ec3d70cd1b050ad45aae46	2	2.0049685	112.88
015a5f0dec6757e1ac48c5e4ab59f993	2	2.245586	87.12
af2e2787bc098c147a7b9b9d67dde1e6	2	4.0421265	94.88
53dbe04e4c976aeaa0ce9237877203a4	2	3.2948955	90.64
669cd59c5d68a0402b0af0a3d49fb7f5	2	4.6944455	83.28
46aacc81600352f960c752a08fd9f74a	2	3.29326	97.84
37ae550b31b1a1f04838fe9ab3d5936e	2	0.6207	80.4
2afd866d4129ef3634dfcdcc6ad185b5	2	2.7880075	85.44
ade31edec13cd362d4386c185569fa5f	2	1.263276	95.68
0ee1c6fa0c48fbec98094294faf19e53	2	2.576105	96.88
502deaba35e3801c7a8b1c4dff5008a4	2	2.701323	95.84
7435ede765b1fcb88aeb0f8438f8f59b	2	3.1614765	89.52
9c8919fd220801edc5792b96c1e785a3	2	5.871784	90.16
f460a179f26bbabeb23c7846dccd1cff	2	3.9228385	89.84
e418437aeb8353a10f5115c71f3e589c	2	-0.1468465	99.18
1c25f1c0f0b073357e53f11a06591316	2	0.7304985	91.98
964c77a342b7ecb6b5d53e94b441a3dd	2	4.6206875	150.66
7f867af2c80a5c7c46e1543b74dcd6e9	2	-0.462427	116.82
c4e24cb1745c1df6da0ddcc0980a6948	2	2.346006	107.91
4f2c76ba6680320d255730c6b532c741	2	3.511181	85.32
b9eac2ab1831163a2dd8a2a678c57d09	2	2.4057445	108.54
b0da6be751a32c10e588cbd80e0e0e4f	2	3.5809525	99
5504306b5ab7a7b339fdd1fb888ad660	2	-0.28301	89.19
6b68df6ac31ba9008b9cf26d6df2b322	2	1.3012585	94.05
c11e70fd3bb3a4c6ee33cc3351431031	2	1.935794	97.29
42882276ae51f6f3387e8ae615314e79	2	1.495475	97.47
b1a215685913442edac162b52ad84c0f	2	0.051824	68.04
8fed58ab8620e6a252a2c85ace7caa23	2	4.113391	117.63
8245f00250a5ac2074403b1209a294b6	2	-1.1787885	93.33
3414ee835420d25b91897a16c9037013	2	1.242929	103.5
7b2e94981915dccbadcaecb7cb6dfe50	2	2.8956225	108.36
ac5eddb7049231e321305035294c7f12	2	0.4672155	91.62
5852b9b7b0099cb192eaf569f251bfb3	2	4.291088	117.63
00f52b18c97c1dd20a10ef703d2acb92	2	3.270496	108.18
598f0141ed45aeda375d4cb02d44bd2f	2	5.300814	108.99
ff08c92ab956f4371d11f655b02a8b04	2	4.5791285	112.05
62c5644c806b77dced46cfca9e8e375e	2	1.997249	108.63
81d708849964e66fcc0b1965de6746b4	2	1.578451	102.96
95dd62fb0f5b9b8d65ce3aabb3b00260	2	3.815017	93.51
7c8d8424f0a7e7da5139f73f35ba15af	2	1.3859015	99.27
af0a2290f85d62beaf800264713f85cd	2	-2.100347	79.02
3d87bd37cd2d39c82907d4947d249924	2	-3.877021	102.96
a78750f2fae7643ca26df22fa5fb8069	2	-0.430168	104.58
fd9eb5e0ec923ebf1cfec6972c100af7	2	1.656305	95.94
b23432019770025299967d6260823967	2	2.7032045	111.06
848f28cb8c90a754a4f1a26046948936	2	2.293909	90
7dd47f8bd2152b1fe869b8da3b7ef4e0	2	0.757363	100.71
21dac7965e4dae969a4458ed4a1aee62	2	8.913121	104.31
376e731bd0a51e9eca5a8a05eb56f348	2	4.4361495	121.41
98b077ce5f3cd803db12e2d37d040e4e	2	3.2494365	98.28
6455752e7da98a364550904e67fe7876	2	5.6369755	122.76
0c79fb953b1b044378b2807b37446deb	2	4.414074	95.13
fde7aab7748c0d040410d958efc5554f	2	5.2411145	100.98
63b73a5f6ceafb1e5ba5300eb64c1aac	2	1.5676315	92.16
d21dec9af97a634c83676bb7a099356a	2	1.9316655	107.73
4bb66c15444c5e12efe0c93f27ab71da	2	2.843799	99.09
6b931fb6e4e3bb0c9cf459592f0f2f8f	2	3.4134835	113.4
ca87c4252b83eeca7d8e18b1a8bd3764	2	1.9167545	95.85
01e6c32ac455d1b66d50905981846b5a	2	3.208852	79.2
0e54279e9934046cdfe989c2f318f913	2	1.571459	110.88
877a59352135e57238da9de95dbdb360	2	3.186275	86.58
1f32a97ea4aa9e20da74dcc2faec6506	2	3.6479645	115.74
bb0beb6e0c7e85454c932da94f81a877	2	4.933974	101.79
c5dbeef337d72515941b8889442391e9	2	0.592927	104.94
570dcc61634f0abd7ab64fdc5a814e96	2	4.8717235	121.5
9b362dcd8076f9c8e72f7d59056fc9fc	2	4.3065885	107.73
556cc8e8b830e7cac1582d5ea81ed555	2	1.6222135	100.35
48e1ff3a09a7350b58f8f68c48820495	2	4.433836	122.13
c5fc58a9fa47b4be81bcf6bbea8d7601	2	0.421301	128.88
9bfdb32ac5dcc150404e70072b2ac506	2	5.8278355	92.34
7f7c648e9fe8a75a84abc271b99abe14	2	4.538712	108.81
091987379e2bf9405e59b2314357f95b	2	2.6098545	107.82
b12037c6ab77ad09edc61ff6722eb121	2	2.658014	105.84
681d695fd33a6d465647704b4dbbd175	2	4.9057795	121.59
1bd9ec54997f2592917e267fecfb7352	2	5.1669055	104.49
f86a2b4a0622947e27d7bbd8389c5820	2	4.540173	100.35
ed7fcf0526aca16dbd949eaeb149f611	2	2.095687	101.07
faf518aa57809b50abb3006f51c768bd	2	2.8823175	104.67
4177f1fd02df9b42c8451ef3299d93e2	2	-0.147109	109.62
f6b6d54dbd8bb356cf4bbd7d6bfe756c	2	1.915832	120.15
58cce52046c463ded7ed974096bb66b3	2	1.8251535	102.42
49d272ae57189a4c2fe37c640913f748	2	3.2373645	133.29
820d1d82d06025d704530e66798a34a6	2	1.9123615	114.93
45ecedbeb599575fe6cf84f8d611018e	2	3.6666555	103.41
9fa0add48ba90aa621c53f3e5bb02bf9	2	2.301846	101.16
6fa0f5885b3cdb2b06ea41bc0920b953	2	3.7316565	104.04
7d25c8ef5db7aad70cd1997c5d194a51	2	2.034732	117.18
a7ad9bec1ecebf0143fb94fb7d31058a	2	1.522152	116.37
f922d99962e3accb2b7f4935c1314228	2	1.108021	149.76
ee9531cf64f3b093416a8f1fc5967332	2	3.2000515	139.95
73fb6a16d5c29715da5fc26f2058db00	2	1.7865765	105.68
62ba75c5a8f665dac1a842ba4247e0c6	2	4.792042	111.87
1c251babed8b129da686abf782edf402	2	6.6128365	109.98
dc36db9b590751283f2a85c750a3afd3	2	7.6332225	91.89
cfd13f6204e59ca973b7853571be151a	2	0.595892	112.41
311d6efee5b808962e1297b4af1059ae	2	3.7773	94.68
741dd76786b5e480f4cd133a6ae25cef	2	0.692471	115.92
a1d9110eb8c214c2d12ac867965be614	2	6.618234	113.58
72ba81542ef2eae4492d063dc9ed714f	2	4.149827	105.57
42d49795c3656af70a38fe86281b2664	2	7.9284495	112.95
95c05f9a92966cff5d31ea1929108678	2	2.657613	91.35
5a9cc554abd62545680148b0caea54ea	2	2.69583464285714	99.99
6e20421194c223d7ff1e802c5b7bcd91	2	5.7664355	102.96
39ae0dd9a3276a7e89da831793125821	2	1.9944825	186.93
c7fdd91c114fc839fc2699a3e19b2f6f	2	3.3130585	109.89
d38af6c6b48fc713c9c157a3a53a8bb3	2	7.387312	114.84
3c260f5683b2c67839a80973670f1035	2	2.69583464285714	113.94
2e39f14fd3e7feb95b126ec82a4b09a0	2	3.8992765	118.17
cf200074de046f7d6bbec19764c7961c	2	0.126263	110.16
9bb1cac8bb334b282ea28aaabaea1e70	2	1.861741	101.7
508b6d96f44d4e8657e0950266a94ebd	2	3.8532	105.48
b71959b432fb54089c8ce1fb7da72008	2	4.335223	99.63
da253cace84774e894482fd3d51f386b	2	4.273656	123.39
b1abcd74fb6fffd436340dd3a9269e49	2	4.6243035	111.33
15c9b433db25a7f561fa0f94d28d723d	2	2.3855655	102.6
119b33260cd28b9267f3fe3c28e4a740	2	2.69583464285714	105.03
3489c4c31e497079be54984ad4e6f1c0	2	1.815552	119.97
5b020fa36137af642f81a16bc9441084	2	0.022609	115.29
c01efb8e6afbd762698154020f7be8cf	2	2.69583464285714	114.12
9aa15e52b38085acfb6a8b6f2f11d012	2	3.2624135	104.67
73992bba2ca9c1ed170144b9a3605104	2	1.487121	112.77
a6f48a1399859538f2954374b6ce0e22	2	2.2101235	110.16
de1007564335c545a9b18973a7e6c129	2	6.148475	122.04
39d3518d61f770c0d3f80eb090cc7e71	2	3.7222075	113.49
409b5bd81af1bac6ade6b9e15e8f40f8	2	0.6886255	112.32
342d3df772e2d9e27350123b0a81c0bf	2	2.0633575	106.11
415481088b64c0cddf4173dc4f1d3b72	2	-0.727306	118.26
b31ec8386d9a531d2507593ac24cfaf5	2	3.0531765	122.49
a725bcb110ed89344a3bfeb1ad077de4	2	-0.652858	119.88
ecac018d8617efe6117a5efca744237a	2	0.319373	96.12
885a8614deb025680fbe97e4279c0e4b	2	5.4741305	133.11
b32eda8aab00c85dfaf988b60b23b1c3	2	1.419056	108.72
8444c73644efb6f0103ecebd7929bade	2	1.559632	136.89
a430b7181e80bab482d32a07bc1a33c4	2	2.7711135	111.78
4004900ec1d7f6998bef07aee4f1905e	2	1.941669	123.75
248b605ead25de828c3f8677a01fa04b	2	1.92369	93.42
