# Supplementary material for: Electric field causes volumetric changes in the human brain
Source: eLife. 2019 Oct 23;8:e49115. doi: 10.7554/eLife.49115 (PMC6874416; doi:10.7554/eLife.49115)
Supplement: Figure 4—figure supplement 1—source data 1. [file elife-49115-fig4-figsupp1-data1.csv]

t_withoutpermutation	permnum	t_withpermutation	permtype
3.88415569564523	1	0.469525328777243	1
3.88415569564523	2	0.687362192676461	1
3.88415569564523	3	0.806421843853763	1
3.88415569564523	4	0.761424361266155	1
3.88415569564523	5	-0.222433949612103	1
3.88415569564523	6	0.974129297963511	1
3.88415569564523	7	4.03704912239728	1
3.88415569564523	8	3.88415569564523	1
3.88415569564523	9	2.03279960584427	1
3.88415569564523	10	-0.021690864010944	1
3.88415569564523	11	-0.129936683527641	1
3.88415569564523	12	0.967341822361106	1
3.88415569564523	13	0.899530120992869	1
3.88415569564523	14	1.09908073825871	1
3.88415569564523	15	0.581952128028763	1
3.88415569564523	16	1.62676323148349	1
3.88415569564523	17	4.91610491333515	1
3.88415569564523	18	2.08982309286435	1
3.88415569564523	19	0.13655815653558	1
3.88415569564523	20	0.579853966036065	1
3.88415569564523	21	2.12446804327658	1
3.88415569564523	22	-0.481670377434434	1
3.88415569564523	23	-0.673821235655804	1
3.88415569564523	24	3.56532195979571	1
3.88415569564523	25	3.64620309940772	1
3.88415569564523	26	0.647218088051966	1
3.88415569564523	27	1.89367080411656	1
3.88415569564523	28	0.290687347713733	1
3.88415569564523	29	0.61115379709168	1
3.88415569564523	30	1.59920629952578	1
3.88415569564523	31	0.38811638770433	1
3.88415569564523	32	1.53100821510576	1
3.88415569564523	33	1.5752798676716	1
3.88415569564523	34	2.14833021808371	1
3.88415569564523	35	-1.37292483808698	1
3.88415569564523	36	-0.299868640289472	1
3.88415569564523	37	1.41288105058129	1
3.88415569564523	38	0.713730094322426	1
3.88415569564523	39	0.165964614470197	1
3.88415569564523	40	0.125704030232676	1
3.88415569564523	41	0.109164180452123	1
3.88415569564523	42	0.348893015452006	1
3.88415569564523	43	-0.460464421308563	1
3.88415569564523	44	1.74269207087708	1
3.88415569564523	45	-0.489010171114511	1
3.88415569564523	46	-0.00154947838943772	1
3.88415569564523	47	-0.593564290635439	1
3.88415569564523	48	1.26941970784125	1
3.88415569564523	49	0.242577487814308	1
3.88415569564523	50	1.49592726330789	1
3.88415569564523	51	4.23254193473109	1
3.88415569564523	52	0.47523229600568	1
3.88415569564523	53	0.254558963774211	1
3.88415569564523	54	0.317706070859907	1
3.88415569564523	55	-2.50801398680945	1
3.88415569564523	56	-0.733459149222952	1
3.88415569564523	57	4.3715014135989	1
3.88415569564523	58	3.13142538192658	1
3.88415569564523	59	-0.529985593405619	1
3.88415569564523	60	2.14317725052157	1
3.88415569564523	61	0.176027673583011	1
3.88415569564523	62	0.262240780578165	1
3.88415569564523	63	1.57943689642362	1
3.88415569564523	64	0.432298706451124	1
3.88415569564523	65	1.72543496726543	1
3.88415569564523	66	1.38309710695834	1
3.88415569564523	67	3.42772134884292	1
3.88415569564523	68	-0.664888114324874	1
3.88415569564523	69	-0.735574913261964	1
3.88415569564523	70	1.84594418577866	1
3.88415569564523	71	-0.789670611109825	1
3.88415569564523	72	-0.150614504960525	1
3.88415569564523	73	-2.21330933882853	1
3.88415569564523	74	0.313201374824796	1
3.88415569564523	75	-1.83538226961585	1
3.88415569564523	76	-0.884148384255307	1
3.88415569564523	77	2.27398178786064	1
3.88415569564523	78	-1.22231996047764	1
3.88415569564523	79	-1.29463546693412	1
3.88415569564523	80	-1.88514552586878	1
3.88415569564523	81	0.891271340329586	1
3.88415569564523	82	-0.951998593168669	1
3.88415569564523	83	1.84109426557039	1
3.88415569564523	84	3.44204685592469	1
3.88415569564523	85	0.414621686903753	1
3.88415569564523	1	2.5071082171404	2
3.88415569564523	2	3.95764167288822	2
3.88415569564523	3	3.85221517385201	2
3.88415569564523	4	4.21951342903648	2
3.88415569564523	5	4.15882119507925	2
3.88415569564523	6	3.38570517753518	2
3.88415569564523	7	3.40246823947298	2
3.88415569564523	8	3.88415569564523	2
3.88415569564523	9	2.67301426095237	2
3.88415569564523	10	3.27672743334061	2
3.88415569564523	11	2.65441546076799	2
3.88415569564523	12	3.26436449378257	2
3.88415569564523	13	1.99634646390235	2
3.88415569564523	14	2.11209363490192	2
3.88415569564523	15	2.30399962599469	2
3.88415569564523	16	2.53417068978481	2
3.88415569564523	17	1.63495314196326	2
3.88415569564523	18	2.19141459686836	2
3.88415569564523	19	2.71757867034197	2
3.88415569564523	20	3.88036923925576	2
3.88415569564523	21	3.98930889427955	2
3.88415569564523	22	2.97654392131792	2
3.88415569564523	23	3.49642281881042	2
3.88415569564523	24	2.47400182227956	2
3.88415569564523	25	1.89236453902305	2
3.88415569564523	26	3.89327227431194	2
3.88415569564523	27	2.14897737461458	2
3.88415569564523	28	3.75556976565277	2
3.88415569564523	29	3.77191013444651	2
3.88415569564523	30	3.38418706411655	2
3.88415569564523	31	3.02407379094078	2
3.88415569564523	32	3.25024150057365	2
3.88415569564523	33	3.08182862092901	2
3.88415569564523	34	1.67944181114328	2
3.88415569564523	35	1.34130906902438	2
3.88415569564523	36	3.64769601837264	2
3.88415569564523	37	2.91294348069221	2
3.88415569564523	38	3.69256306431103	2
3.88415569564523	39	4.14735777649274	2
3.88415569564523	40	3.78363769958719	2
3.88415569564523	41	2.08368672953141	2
3.88415569564523	42	3.02344298605752	2
3.88415569564523	43	2.54973312232944	2
3.88415569564523	44	4.23981052672022	2
3.88415569564523	45	3.68592413326708	2
3.88415569564523	46	2.65197568084109	2
3.88415569564523	47	2.18640612576334	2
3.88415569564523	48	3.54677803308214	2
3.88415569564523	49	3.4870010770403	2
3.88415569564523	50	3.19963990212173	2
3.88415569564523	51	1.90150531098148	2
3.88415569564523	52	4.56058656473748	2
3.88415569564523	53	2.4492295368642	2
3.88415569564523	54	3.63117800738983	2
3.88415569564523	55	1.04518580354608	2
3.88415569564523	56	2.83453370924279	2
3.88415569564523	57	1.06513309155114	2
3.88415569564523	58	1.64686890899233	2
3.88415569564523	59	2.05841678117386	2
3.88415569564523	60	2.37595071526877	2
3.88415569564523	61	3.46163379216502	2
3.88415569564523	62	3.3522063927942	2
3.88415569564523	63	1.83877235465551	2
3.88415569564523	64	3.07938610650253	2
3.88415569564523	65	3.57018757816012	2
3.88415569564523	66	1.08663422450965	2
3.88415569564523	67	1.8897502361778	2
3.88415569564523	68	1.12032597766272	2
3.88415569564523	69	2.45661130497174	2
3.88415569564523	70	1.15072913426867	2
3.88415569564523	71	1.82249313175039	2
3.88415569564523	72	3.88330932534896	2
3.88415569564523	73	2.14581595578391	2
3.88415569564523	74	2.17557464332101	2
3.88415569564523	75	0.760501547030273	2
3.88415569564523	76	2.29926894013196	2
3.88415569564523	77	4.19776517178415	2
3.88415569564523	78	3.54274990818361	2
3.88415569564523	79	2.60394353119296	2
3.88415569564523	80	0.797010431357594	2
3.88415569564523	81	1.60162280389035	2
3.88415569564523	82	2.33798555119749	2
3.88415569564523	83	2.73267704438507	2
3.88415569564523	84	1.13521513504761	2
3.88415569564523	85	2.476282997592	2
