# Supplementary material for: Electric field causes volumetric changes in the human brain
Source: eLife. 2019 Oct 23;8:e49115. doi: 10.7554/eLife.49115 (PMC6874416; doi:10.7554/eLife.49115)
Supplement: Figure 4—source data 1. [file elife-49115-fig4-data1.csv]

subjid	side	volumechange_Amygdala	EF_Amygdala
8795f0db2265fb56ab3c0d4ee9bda16c	1	0.9773005	50.32
0eda715eca398113135370b1e65b8c34	1	1.9141155	46.64
1502353e43babd426a862ba15dce65da	1	2.5642035	57.44
961e31139ae768b9d14fbb2f6e50fc3f	1	0.636996	60.16
565c9351007d7479283b6e6b548caa4b	1	2.6845835	62.72
35eab82659fd800fd61a0877d595f674	1	-0.1210785	62
3774f0102f5e0c4f7f933537add1dc49	1	4.300136	55.52
55c7a10e4a50cbc28b48138bbe9c23e0	1	2.7255495	57.84
d4f44960257ccca79c48dcad305d9890	1	1.2751735	45.76
8f2aea618a4edd1f6deeb3b72ce46d0f	1	1.37058	62.96
7faac8b75f5d660a026bad4112764bc4	1	2.850241	54
f1a026999130c9e825bd882c0a654d3c	1	2.453412	62.88
30e1e3a9b8f333f7948260d700416b5f	1	1.226037	50.48
cddf742dbf60b919c4eff735ff87005b	1	2.315615	60
3f173f73e8e1d06fe4ed7eeedee7a2cd	1	3.9320965	59.6
705ecb6e24ec3d70cd1b050ad45aae46	1	3.0017785	65.12
015a5f0dec6757e1ac48c5e4ab59f993	1	-0.5302235	52.96
af2e2787bc098c147a7b9b9d67dde1e6	1	3.9588575	60.4
53dbe04e4c976aeaa0ce9237877203a4	1	4.0154665	55.28
669cd59c5d68a0402b0af0a3d49fb7f5	1	2.9273015	51.6
46aacc81600352f960c752a08fd9f74a	1	2.976567	60.48
37ae550b31b1a1f04838fe9ab3d5936e	1	1.3843435	47.6
2afd866d4129ef3634dfcdcc6ad185b5	1	2.84601	53.76
ade31edec13cd362d4386c185569fa5f	1	0.428186	57.2
0ee1c6fa0c48fbec98094294faf19e53	1	3.2601315	61.44
502deaba35e3801c7a8b1c4dff5008a4	1	3.113462	61.52
7435ede765b1fcb88aeb0f8438f8f59b	1	0.6376645	56.16
9c8919fd220801edc5792b96c1e785a3	1	4.8286285	61.44
f460a179f26bbabeb23c7846dccd1cff	1	1.666484	53.6
e418437aeb8353a10f5115c71f3e589c	1	-1.001376	52.74
1c25f1c0f0b073357e53f11a06591316	1	0.5571865	58.59
964c77a342b7ecb6b5d53e94b441a3dd	1	1.7535305	70.47
7f867af2c80a5c7c46e1543b74dcd6e9	1	3.263014	63.99
c4e24cb1745c1df6da0ddcc0980a6948	1	2.289941	59.67
4f2c76ba6680320d255730c6b532c741	1	2.566723	51.93
b9eac2ab1831163a2dd8a2a678c57d09	1	2.517571	64.17
b0da6be751a32c10e588cbd80e0e0e4f	1	-1.285709	49.86
5504306b5ab7a7b339fdd1fb888ad660	1	-1.967986	51.57
6b68df6ac31ba9008b9cf26d6df2b322	1	0.9383395	53.64
c11e70fd3bb3a4c6ee33cc3351431031	1	-2.0299445	55.71
42882276ae51f6f3387e8ae615314e79	1	1.876614	55.53
b1a215685913442edac162b52ad84c0f	1	1.2968095	47.07
8fed58ab8620e6a252a2c85ace7caa23	1	5.4290155	62.28
8245f00250a5ac2074403b1209a294b6	1	1.395068	51.57
3414ee835420d25b91897a16c9037013	1	1.9275695	67.86
7b2e94981915dccbadcaecb7cb6dfe50	1	1.387365	66.51
ac5eddb7049231e321305035294c7f12	1	2.1007895	61.38
5852b9b7b0099cb192eaf569f251bfb3	1	-0.2231275	68.67
00f52b18c97c1dd20a10ef703d2acb92	1	0.3495785	61.65
598f0141ed45aeda375d4cb02d44bd2f	1	5.880095	65.61
ff08c92ab956f4371d11f655b02a8b04	1	2.4018225	57.06
62c5644c806b77dced46cfca9e8e375e	1	-0.4514495	52.2
81d708849964e66fcc0b1965de6746b4	1	3.1488045	65.25
95dd62fb0f5b9b8d65ce3aabb3b00260	1	2.8976195	58.59
7c8d8424f0a7e7da5139f73f35ba15af	1	-2.3714975	55.62
af0a2290f85d62beaf800264713f85cd	1	-0.885261	41.85
3d87bd37cd2d39c82907d4947d249924	1	6.037295	58.95
a78750f2fae7643ca26df22fa5fb8069	1	-0.758969	53.37
fd9eb5e0ec923ebf1cfec6972c100af7	1	3.0047445	54.99
b23432019770025299967d6260823967	1	2.234909	65.34
848f28cb8c90a754a4f1a26046948936	1	1.5613315	39.33
7dd47f8bd2152b1fe869b8da3b7ef4e0	1	2.355772	57.87
21dac7965e4dae969a4458ed4a1aee62	1	8.4434285	63.81
376e731bd0a51e9eca5a8a05eb56f348	1	5.3062795	76.23
98b077ce5f3cd803db12e2d37d040e4e	1	-0.9720755	63.27
6455752e7da98a364550904e67fe7876	1	1.578796	61.92
0c79fb953b1b044378b2807b37446deb	1	1.8389145	53.82
fde7aab7748c0d040410d958efc5554f	1	2.3665295	62.91
63b73a5f6ceafb1e5ba5300eb64c1aac	1	1.405464	46.8
d21dec9af97a634c83676bb7a099356a	1	3.453229	60.84
4bb66c15444c5e12efe0c93f27ab71da	1	-1.2164555	40.23
6b931fb6e4e3bb0c9cf459592f0f2f8f	1	4.420445	67.5
ca87c4252b83eeca7d8e18b1a8bd3764	1	-0.228853	52.38
01e6c32ac455d1b66d50905981846b5a	1	2.875315	48.42
0e54279e9934046cdfe989c2f318f913	1	1.7109475	60.3
877a59352135e57238da9de95dbdb360	1	3.0966455	43.38
1f32a97ea4aa9e20da74dcc2faec6506	1	3.477653	67.32
bb0beb6e0c7e85454c932da94f81a877	1	5.1248715	63.54
c5dbeef337d72515941b8889442391e9	1	0.4023075	63
570dcc61634f0abd7ab64fdc5a814e96	1	2.904328	68.13
9b362dcd8076f9c8e72f7d59056fc9fc	1	0.8004375	72.81
556cc8e8b830e7cac1582d5ea81ed555	1	0.6100935	40.68
48e1ff3a09a7350b58f8f68c48820495	1	6.7468935	69.48
c5fc58a9fa47b4be81bcf6bbea8d7601	1	2.6055175	72.99
9bfdb32ac5dcc150404e70072b2ac506	1	0.612611	54.09
7f7c648e9fe8a75a84abc271b99abe14	1	4.3381675	68.58
091987379e2bf9405e59b2314357f95b	1	3.8021655	61.65
b12037c6ab77ad09edc61ff6722eb121	1	4.9274215	61.65
681d695fd33a6d465647704b4dbbd175	1	2.1366055	72.09
1bd9ec54997f2592917e267fecfb7352	1	1.520313	62.1
f86a2b4a0622947e27d7bbd8389c5820	1	1.719949	50.13
ed7fcf0526aca16dbd949eaeb149f611	1	2.9996165	55.8
faf518aa57809b50abb3006f51c768bd	1	3.7529055	62.28
4177f1fd02df9b42c8451ef3299d93e2	1	-0.612657	60.03
f6b6d54dbd8bb356cf4bbd7d6bfe756c	1	2.000076	73.89
58cce52046c463ded7ed974096bb66b3	1	3.250821	64.26
49d272ae57189a4c2fe37c640913f748	1	3.024852	67.59
820d1d82d06025d704530e66798a34a6	1	1.0872835	64.8
45ecedbeb599575fe6cf84f8d611018e	1	3.5211485	60.12
9fa0add48ba90aa621c53f3e5bb02bf9	1	-1.158642	51.39
6fa0f5885b3cdb2b06ea41bc0920b953	1	2.537043	55.71
7d25c8ef5db7aad70cd1997c5d194a51	1	3.107126	68.31
a7ad9bec1ecebf0143fb94fb7d31058a	1	1.656954	65.88
f922d99962e3accb2b7f4935c1314228	1	3.863163	66.51
ee9531cf64f3b093416a8f1fc5967332	1	-0.282978	70.2
73fb6a16d5c29715da5fc26f2058db00	1	1.587197	64.8
62ba75c5a8f665dac1a842ba4247e0c6	1	7.555521	55.8
1c251babed8b129da686abf782edf402	1	2.184565	58.59
dc36db9b590751283f2a85c750a3afd3	1	-0.4774965	50.31
cfd13f6204e59ca973b7853571be151a	1	1.429112	51.48
311d6efee5b808962e1297b4af1059ae	1	0.6435965	51.66
741dd76786b5e480f4cd133a6ae25cef	1	5.9820195	72.27
a1d9110eb8c214c2d12ac867965be614	1	5.5838815	57.06
72ba81542ef2eae4492d063dc9ed714f	1	1.565212	65.43
42d49795c3656af70a38fe86281b2664	1	5.4388495	61.83
95c05f9a92966cff5d31ea1929108678	1	1.4719585	48.87
5a9cc554abd62545680148b0caea54ea	1	0.3429	55.89
6e20421194c223d7ff1e802c5b7bcd91	1	4.720343	52.74
39ae0dd9a3276a7e89da831793125821	1	4.642279	74.79
c7fdd91c114fc839fc2699a3e19b2f6f	1	0.331788	56.7
d38af6c6b48fc713c9c157a3a53a8bb3	1	2.8434975	60.75
3c260f5683b2c67839a80973670f1035	1	1.3714	57.69
2e39f14fd3e7feb95b126ec82a4b09a0	1	3.3817335	56.43
cf200074de046f7d6bbec19764c7961c	1	1.32095	58.59
9bb1cac8bb334b282ea28aaabaea1e70	1	5.4615	58.95
508b6d96f44d4e8657e0950266a94ebd	1	4.248927	66.15
b71959b432fb54089c8ce1fb7da72008	1	-1.08761	55.08
da253cace84774e894482fd3d51f386b	1	5.5999785	69.12
b1abcd74fb6fffd436340dd3a9269e49	1	9.558691	53.01
15c9b433db25a7f561fa0f94d28d723d	1	7.0571185	61.38
119b33260cd28b9267f3fe3c28e4a740	1	6.978416	66.96
3489c4c31e497079be54984ad4e6f1c0	1	2.176199	55.35
5b020fa36137af642f81a16bc9441084	1	2.929308	51.3
c01efb8e6afbd762698154020f7be8cf	1	1.0487785	58.59
9aa15e52b38085acfb6a8b6f2f11d012	1	-1.140548	53.28
73992bba2ca9c1ed170144b9a3605104	1	0.3942445	53.91
a6f48a1399859538f2954374b6ce0e22	1	4.1899415	53.55
de1007564335c545a9b18973a7e6c129	1	0.156566	52.74
39d3518d61f770c0d3f80eb090cc7e71	1	2.8957595	53.73
409b5bd81af1bac6ade6b9e15e8f40f8	1	5.651887	54.63
342d3df772e2d9e27350123b0a81c0bf	1	2.800594	64.53
415481088b64c0cddf4173dc4f1d3b72	1	1.1590085	62.37
b31ec8386d9a531d2507593ac24cfaf5	1	0.6849405	63.18
a725bcb110ed89344a3bfeb1ad077de4	1	-0.7101225	64.62
ecac018d8617efe6117a5efca744237a	1	4.4748125	58.32
885a8614deb025680fbe97e4279c0e4b	1	2.660644	64.53
b32eda8aab00c85dfaf988b60b23b1c3	1	5.8580135	47.52
8444c73644efb6f0103ecebd7929bade	1	3.459862	48.78
a430b7181e80bab482d32a07bc1a33c4	1	-4.3749935	51.84
4004900ec1d7f6998bef07aee4f1905e	1	5.158661	63.99
248b605ead25de828c3f8677a01fa04b	1	1.5638625	57.33
8795f0db2265fb56ab3c0d4ee9bda16c	2	0.8734685	76.24
0eda715eca398113135370b1e65b8c34	2	3.8866155	75.92
1502353e43babd426a862ba15dce65da	2	1.7830475	86.16
961e31139ae768b9d14fbb2f6e50fc3f	2	1.9915565	87.36
565c9351007d7479283b6e6b548caa4b	2	5.3365695	93.84
35eab82659fd800fd61a0877d595f674	2	3.051148	101.28
3774f0102f5e0c4f7f933537add1dc49	2	7.443461	95.36
55c7a10e4a50cbc28b48138bbe9c23e0	2	3.693135	86.16
d4f44960257ccca79c48dcad305d9890	2	1.3320025	69.2
8f2aea618a4edd1f6deeb3b72ce46d0f	2	3.477743	103.76
7faac8b75f5d660a026bad4112764bc4	2	4.6421075	81.44
f1a026999130c9e825bd882c0a654d3c	2	5.4096645	95.2
30e1e3a9b8f333f7948260d700416b5f	2	-0.2831915	87.92
cddf742dbf60b919c4eff735ff87005b	2	6.342761	99.92
3f173f73e8e1d06fe4ed7eeedee7a2cd	2	3.7469415	83.12
705ecb6e24ec3d70cd1b050ad45aae46	2	5.0306695	105.68
015a5f0dec6757e1ac48c5e4ab59f993	2	3.6204045	79.04
af2e2787bc098c147a7b9b9d67dde1e6	2	6.597253	94.96
53dbe04e4c976aeaa0ce9237877203a4	2	4.529315	89.6
669cd59c5d68a0402b0af0a3d49fb7f5	2	5.411425	81.36
46aacc81600352f960c752a08fd9f74a	2	2.4949085	94.08
37ae550b31b1a1f04838fe9ab3d5936e	2	1.3132	74.72
2afd866d4129ef3634dfcdcc6ad185b5	2	2.7398955	83.92
ade31edec13cd362d4386c185569fa5f	2	-0.3471085	92.16
0ee1c6fa0c48fbec98094294faf19e53	2	4.5692695	91.36
502deaba35e3801c7a8b1c4dff5008a4	2	5.7208655	93.6
7435ede765b1fcb88aeb0f8438f8f59b	2	3.1767845	88.72
9c8919fd220801edc5792b96c1e785a3	2	5.988262	82.56
f460a179f26bbabeb23c7846dccd1cff	2	3.352282	86.48
e418437aeb8353a10f5115c71f3e589c	2	0.4314215	96.39
1c25f1c0f0b073357e53f11a06591316	2	1.0799045	81.63
964c77a342b7ecb6b5d53e94b441a3dd	2	7.450077	153.81
7f867af2c80a5c7c46e1543b74dcd6e9	2	5.4479705	106.02
c4e24cb1745c1df6da0ddcc0980a6948	2	7.635802	93.42
4f2c76ba6680320d255730c6b532c741	2	3.7215475	81.18
b9eac2ab1831163a2dd8a2a678c57d09	2	4.881089	98.73
b0da6be751a32c10e588cbd80e0e0e4f	2	4.0746815	98.37
5504306b5ab7a7b339fdd1fb888ad660	2	3.032153	85.14
6b68df6ac31ba9008b9cf26d6df2b322	2	4.1989935	83.16
c11e70fd3bb3a4c6ee33cc3351431031	2	0.553286	88.02
42882276ae51f6f3387e8ae615314e79	2	4.207501	94.23
b1a215685913442edac162b52ad84c0f	2	1.4425915	62.55
8fed58ab8620e6a252a2c85ace7caa23	2	7.27144	103.86
8245f00250a5ac2074403b1209a294b6	2	3.602343	83.7
3414ee835420d25b91897a16c9037013	2	3.1649245	92.88
7b2e94981915dccbadcaecb7cb6dfe50	2	5.5060345	92.79
ac5eddb7049231e321305035294c7f12	2	3.7179545	88.11
5852b9b7b0099cb192eaf569f251bfb3	2	3.2189535	111.33
00f52b18c97c1dd20a10ef703d2acb92	2	7.777476	103.95
598f0141ed45aeda375d4cb02d44bd2f	2	5.4896325	95.49
ff08c92ab956f4371d11f655b02a8b04	2	4.051161	103.86
62c5644c806b77dced46cfca9e8e375e	2	4.0580395	99.99
81d708849964e66fcc0b1965de6746b4	2	4.892071	94.5
95dd62fb0f5b9b8d65ce3aabb3b00260	2	5.934693	78.48
7c8d8424f0a7e7da5139f73f35ba15af	2	4.5100635	93.87
af0a2290f85d62beaf800264713f85cd	2	0.3404965	65.43
3d87bd37cd2d39c82907d4947d249924	2	4.415115	99.99
a78750f2fae7643ca26df22fa5fb8069	2	-0.587735	93.42
fd9eb5e0ec923ebf1cfec6972c100af7	2	3.048441	80.28
b23432019770025299967d6260823967	2	3.124802	102.33
848f28cb8c90a754a4f1a26046948936	2	-1.325945	91.35
7dd47f8bd2152b1fe869b8da3b7ef4e0	2	5.303527	100.17
21dac7965e4dae969a4458ed4a1aee62	2	10.1019265	97.56
376e731bd0a51e9eca5a8a05eb56f348	2	6.9357305	117
98b077ce5f3cd803db12e2d37d040e4e	2	4.123931	91.44
6455752e7da98a364550904e67fe7876	2	6.562658	122.13
0c79fb953b1b044378b2807b37446deb	2	5.633065	91.26
fde7aab7748c0d040410d958efc5554f	2	3.800355	94.86
63b73a5f6ceafb1e5ba5300eb64c1aac	2	1.520914	80.91
d21dec9af97a634c83676bb7a099356a	2	8.700809	98.46
4bb66c15444c5e12efe0c93f27ab71da	2	3.6516085	91.98
6b931fb6e4e3bb0c9cf459592f0f2f8f	2	3.773351	108.36
ca87c4252b83eeca7d8e18b1a8bd3764	2	1.1944195	98.37
01e6c32ac455d1b66d50905981846b5a	2	6.9357955	74.16
0e54279e9934046cdfe989c2f318f913	2	10.510884	102.42
877a59352135e57238da9de95dbdb360	2	4.689917	83.61
1f32a97ea4aa9e20da74dcc2faec6506	2	4.1594445	109.08
bb0beb6e0c7e85454c932da94f81a877	2	8.7344985	94.14
c5dbeef337d72515941b8889442391e9	2	2.2933345	98.55
570dcc61634f0abd7ab64fdc5a814e96	2	6.749188	113.67
9b362dcd8076f9c8e72f7d59056fc9fc	2	5.954558	84.78
556cc8e8b830e7cac1582d5ea81ed555	2	5.007767	95.58
48e1ff3a09a7350b58f8f68c48820495	2	5.272568	109.08
c5fc58a9fa47b4be81bcf6bbea8d7601	2	5.394532	124.29
9bfdb32ac5dcc150404e70072b2ac506	2	5.617579	88.65
7f7c648e9fe8a75a84abc271b99abe14	2	7.904594	101.88
091987379e2bf9405e59b2314357f95b	2	7.280671	97.92
b12037c6ab77ad09edc61ff6722eb121	2	4.82175	103.32
681d695fd33a6d465647704b4dbbd175	2	6.5596535	121.59
1bd9ec54997f2592917e267fecfb7352	2	4.582147	103.68
f86a2b4a0622947e27d7bbd8389c5820	2	5.4124375	95.85
ed7fcf0526aca16dbd949eaeb149f611	2	6.36556	99.09
faf518aa57809b50abb3006f51c768bd	2	6.9319725	99.09
4177f1fd02df9b42c8451ef3299d93e2	2	4.978106	109.71
f6b6d54dbd8bb356cf4bbd7d6bfe756c	2	6.019922	121.23
58cce52046c463ded7ed974096bb66b3	2	4.2759765	96.12
49d272ae57189a4c2fe37c640913f748	2	6.613149	130.14
820d1d82d06025d704530e66798a34a6	2	1.952614	109.44
45ecedbeb599575fe6cf84f8d611018e	2	4.954453	104.4
9fa0add48ba90aa621c53f3e5bb02bf9	2	2.3485685	95.94
6fa0f5885b3cdb2b06ea41bc0920b953	2	4.0622355	102.51
7d25c8ef5db7aad70cd1997c5d194a51	2	3.9485525	113.22
a7ad9bec1ecebf0143fb94fb7d31058a	2	5.039013	102.78
f922d99962e3accb2b7f4935c1314228	2	5.553999	175.77
ee9531cf64f3b093416a8f1fc5967332	2	3.668187	169.47
73fb6a16d5c29715da5fc26f2058db00	2	2.1871015	101.6
62ba75c5a8f665dac1a842ba4247e0c6	2	10.8491365	109.62
1c251babed8b129da686abf782edf402	2	14.4352455	100.08
dc36db9b590751283f2a85c750a3afd3	2	3.7849035	89.55
cfd13f6204e59ca973b7853571be151a	2	7.3541585	113.13
311d6efee5b808962e1297b4af1059ae	2	8.296047	99.81
741dd76786b5e480f4cd133a6ae25cef	2	14.437144	109.44
a1d9110eb8c214c2d12ac867965be614	2	11.470799	109.35
72ba81542ef2eae4492d063dc9ed714f	2	6.7650495	107.91
42d49795c3656af70a38fe86281b2664	2	6.774455	111.6
95c05f9a92966cff5d31ea1929108678	2	5.1879895	88.92
5a9cc554abd62545680148b0caea54ea	2	11.4959835	89.91
6e20421194c223d7ff1e802c5b7bcd91	2	8.464829	97.74
39ae0dd9a3276a7e89da831793125821	2	11.9456925	217.17
c7fdd91c114fc839fc2699a3e19b2f6f	2	3.90376	104.04
d38af6c6b48fc713c9c157a3a53a8bb3	2	10.3275265	111.51
3c260f5683b2c67839a80973670f1035	2	3.595789	116.64
2e39f14fd3e7feb95b126ec82a4b09a0	2	5.379236	116.37
cf200074de046f7d6bbec19764c7961c	2	3.478308	96.21
9bb1cac8bb334b282ea28aaabaea1e70	2	9.4209325	106.74
508b6d96f44d4e8657e0950266a94ebd	2	13.659054	97.38
b71959b432fb54089c8ce1fb7da72008	2	8.074703	97.38
da253cace84774e894482fd3d51f386b	2	10.8907645	112.68
b1abcd74fb6fffd436340dd3a9269e49	2	10.286134	106.02
15c9b433db25a7f561fa0f94d28d723d	2	11.1224015	101.97
119b33260cd28b9267f3fe3c28e4a740	2	5.9795495	107.28
3489c4c31e497079be54984ad4e6f1c0	2	5.7733625	109.53
5b020fa36137af642f81a16bc9441084	2	6.1020305	109.8
c01efb8e6afbd762698154020f7be8cf	2	4.339484	112.41
9aa15e52b38085acfb6a8b6f2f11d012	2	5.4271165	108.27
73992bba2ca9c1ed170144b9a3605104	2	4.887251	104.31
a6f48a1399859538f2954374b6ce0e22	2	4.5397815	107.91
de1007564335c545a9b18973a7e6c129	2	5.579576	112.68
39d3518d61f770c0d3f80eb090cc7e71	2	9.281512	108.09
409b5bd81af1bac6ade6b9e15e8f40f8	2	5.9776075	103.95
342d3df772e2d9e27350123b0a81c0bf	2	6.4995795	95.85
415481088b64c0cddf4173dc4f1d3b72	2	3.567956	109.35
b31ec8386d9a531d2507593ac24cfaf5	2	1.9915495	107.64
a725bcb110ed89344a3bfeb1ad077de4	2	-1.365284	115.92
ecac018d8617efe6117a5efca744237a	2	4.3216525	80.91
885a8614deb025680fbe97e4279c0e4b	2	8.254359	118.8
b32eda8aab00c85dfaf988b60b23b1c3	2	7.339156	94.77
8444c73644efb6f0103ecebd7929bade	2	3.2178735	142.38
a430b7181e80bab482d32a07bc1a33c4	2	3.703061	113.13
4004900ec1d7f6998bef07aee4f1905e	2	3.837437	115.2
248b605ead25de828c3f8677a01fa04b	2	6.4871425	93.96
