# Supplementary figures and images for: Electric field causes volumetric changes in the human brain
Source: eLife journal article supplement (doi:10.7554/elife.49115), 2019-10-23

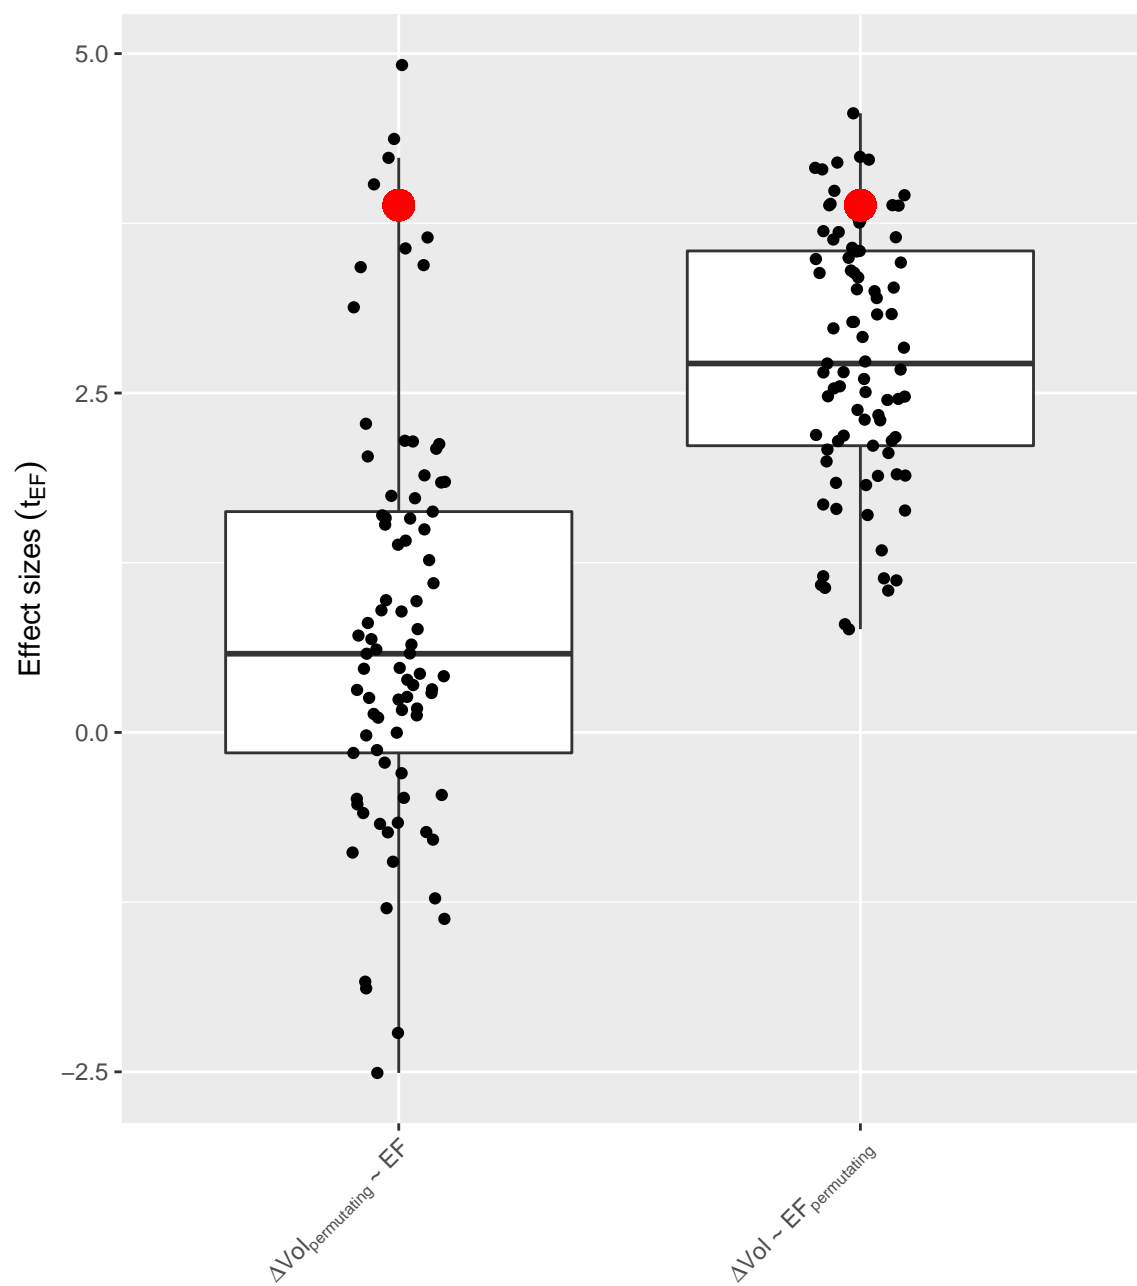

Supplement: supp [file elife-49115-supp-v1.zip]

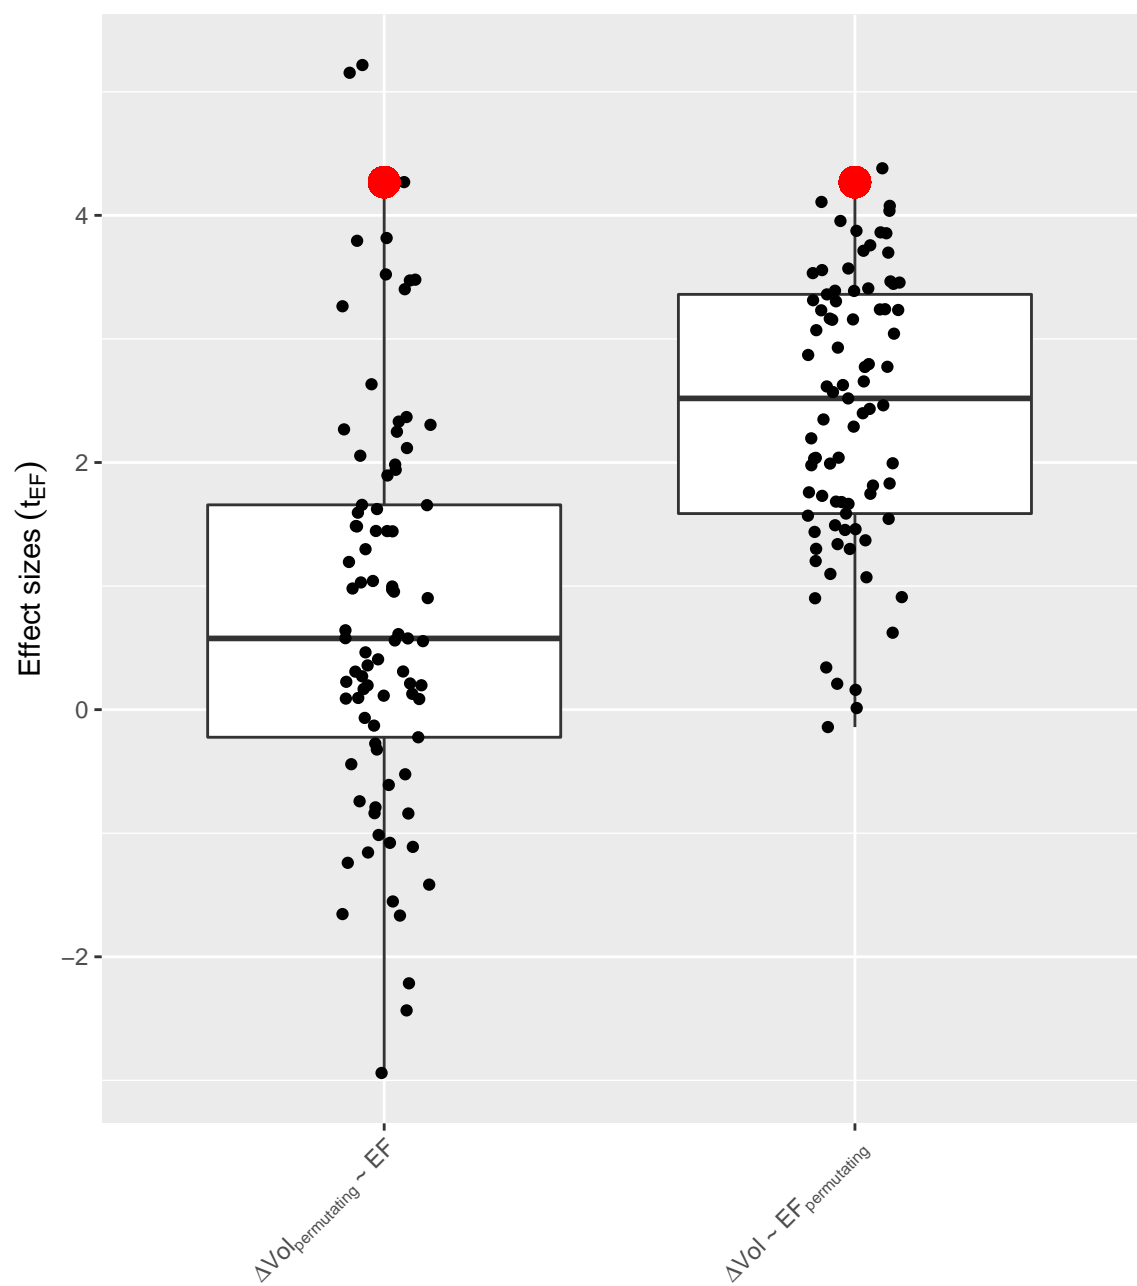

Supplement: supp [file elife-49115-supp-v1.zip]
